# Supplementary material for: Chronic intermittent hypoxia reveals role of the Postinspiratory Complex in the mediation of normal swallow production
Source: eLife. 2024 Apr 24;12:RP92175. doi: 10.7554/eLife.92175 (PMC11042803; doi:10.7554/eLife.92175)
Supplement: Supplementary file 1. [file elife-92175-supp1.xlsx]

## Sheet: Supplementary File 1
A			Water Swallow				+ ChATcre:Ai32 Stimulation
			mean	(	SD	)	mean	(	SD	)	p-value	t	df	Change
		(n=14)
		Swallow Duration (ms)	265	(	132	)	144	(	101	)	0.0008	5.21	8	↓
		Hypoglossal Duration (ms)	299	(	120	)	164	(	95	)	0.0036	4.065	8	↓
		Vagus Duration (ms)	291	(	90	)	175	(	90	)	0.0545	2.27	8	↓
		Laryngeal Complex Duration (ms)	277	(	104	)	139	(	36	)	0.003	4.42	7	↓
		Schluckatmung Duration (ms)	198	(	148	)	-	(	-	)	-	-	-	-
		Diaphragm Inter-Burst Interval (ms)	637	(	184	)	588	(	179	)	0.75	0.34	8	-
		SR Inspiratory Delay (ms)	286	(	118	)	351	(	102	)	0.01	3.14	8	↑
		Swallow Sequence (ms)	69	(	79	)	30	(	20	)	0.4	0.9	7	-
		Swallow Onset: Insp Peak (ms)	122	(	90	)	144	(	88	)	0.41	0.87	8	-
		Swallow Onset: Insp Onset (0-1 of RC)	0.27	(	0.07	)	0.32	(	0.05	)	0.06	2.14	8	-
		Hypoglossal Amplitude (% max)	91	(	6	)	64	(	42	)	0.06	2.176	8	-
		Vagus Amplitude (% max)	95	(	5	)	62	(	35	)	0.029	2.739	7	↓
		Submental Complex Amplitude (% max)	91	(	7	)	38	(	35	)	0.002	4.91	7	↓
		Laryngeal Complex Amplitude (% max)	83	(	11	)	71	(	45	)	0.4275	0.8343	7	-
		Schluckatmung Amplitude (% max)	88	(	14	)	-	(	-	)	-	-	-	-
B			Water Swallow				+ Vglut2cre:Ai32 Stimulation
			mean	(	SD	)	mean	(	SD	)	p-value	t	df	Change
		(n=11)
		Swallow Duration (ms)	308	(	184	)	125	(	44	)	0.0003	6.456	7	↓
		Hypoglossal Duration (ms)	335	(	187	)	144	(	41	)	0.0025	4.593	7	↓
		Vagus Duration (ms)	330	(	188	)	146	(	44	)	0.0047	4.085	7	↓
		Laryngeal Complex Duration (ms)	380	(	238	)	155	(	46	)	0.0042	4.173	7	↓
		Schluckatmung Duration (ms)	119	(	75	)	87	(	12	)	0.6267	0.6644	1	-
		Diaphragm Inter-Burst Interval (ms)	827	(	526	)	459	(	246	)	0.0122	3.353	7	↓
		SR Inspiratory Delay (ms)	361	(	310	)	258	(	150	)	0.2639	1.215	7	-
		Swallow Sequence (ms)	55	(	72	)	28	(	9	)	0.0828	2.022	7	-
		Swallow Onset: Insp Peak (ms)	171	(	113	)	131	(	91	)	0.82	0.24	7	-
		Swallow Onset: Insp Onset (0-1 of RC)	0.28	(	0.09	)	0.38	(	0.06	)	0.1	1.91	7	-
		Hypoglossal Amplitude (% max)	82	(	11	)	44	(	7	)	0.0001	9.449	7	↓
		Vagus Amplitude (% max)	79	(	17	)	50	(	19	)	0.0014	5.125	7	↓
		Submental Complex Amplitude (% max)	84	(	10	)	45	(	32	)	0.0064	3.843	7	↓
		Laryngeal Complex Amplitude (% max)	86	(	11	)	64	(	34	)	0.1033	1.872	7	-
		Schluckatmung Amplitude (% max)	95	(	6	)	160	(	147	)	0.6162	0.6883	1	-
C			Water Swallow				+ ChATcre:Vglut2FlpO:ChR2 Stimulation
			mean	(	SD	)	mean	(	SD	)	p-value	t	df	Change
		(n=11)
		Swallow Duration (ms)	230	(	67	)	130	(	35	)	0.0005	5.622	8	↓
		Hypoglossal Duration (ms)	239	(	45	)	133	(	27	)	0.0003	6.68	7	↓
		Vagus Duration (ms)	256	(	62	)	140	(	37	)	0.0001	7.105	8	↓
		Laryngeal Complex Duration (ms)	260	(	58	)	144	(	34	)	0.0002	6.657	8	↓
		Schluckatmung Duration (ms)	263	(	141	)	114	(	-	)	-	-	-	-
		Diaphragm Inter-Burst Interval (ms)	786	(	327	)	711	(	345	)	0.11	1.788	8	-
		SR Inspiratory Delay (ms)	429	(	264	)	458	(	278	)	0.55	0.6197	8	-
		Swallow Sequence (ms)	34	(	26	)	21	(	13	)	0.08	1.984	8	-
		Swallow Onset: Insp Peak (ms)	175	(	95	)	188	(	151	)	0.3566	0.9783	8	-
		Swallow Onset: Insp Onset (0-1 of RC)	0.29	(	0.06	)	0.34	(	0.1	)	0.003	4.16	8	↑
		Hypoglossal Amplitude (% max)	87	(	9	)	76	(	43	)	0.4731	0.7582	7	-
		Vagus Amplitude (% max)	87	(	7	)	58	(	32	)	0.01	3.18	8	↓
		Submental Complex Amplitude (% max)	88	(	10	)	39	(	22	)	0.0009	7.47	8	↓
		Laryngeal Complex Amplitude (% max)	83	(	13	)	83	(	48	)	0.98	0.02	8	-
		Schluckatmung Amplitude (% max)	95	(	7	)	77	(	-	)	-	-	-	-
