# Supplementary material for: Chronic intermittent hypoxia reveals role of the Postinspiratory Complex in the mediation of normal swallow production
Source: eLife. 2024 Apr 24;12:RP92175. doi: 10.7554/eLife.92175 (PMC11042803; doi:10.7554/eLife.92175)
Supplement: Supplementary file 2. [file elife-92175-supp2.xlsx]

## Sheet: Supplementary File 2
	Water Swallow		Male (n=8)				Female (n=4)
			mean	(	SD	)	mean	(	SD	)	p-value	t	df	Change
		Swallow Duration (ms)	307	(	142	)	181	(	55	)	0.13	1.67	10	-
		XII Duration (ms)	336	(	133	)	224	(	22	)	0.13	1.64	10	-
		Vagus Duration (ms)	312	(	99	)	249	(	57	)	0.27	1.16	10	-
		Laryngeal Complex Duration (ms)	312	(	122	)	225	(	43	)	0.21	1.36	8	-
		Schluckatmung Duration (ms)	198	(	148	)	-	(	-	)	-	-	-	-
		Diaphragm Inter-Burst Interval (ms)	655	(	181	)	601	(	213	)	0.66	0.46	10	-
		SR Inspiratory Delay (ms)	261	(	94	)	335	(	160	)	0.33	1.02	10	-
		Swallow Sequence (ms)	93	(	95	)	33	(	26	)	0.26	1.21	8	-
		Swallow Onset: Insp Peak (ms)	135	(	86	)	94	(	105	)	0.4764	0.74	10	-
		Swallow Onset: Insp Onset (0-1 of RC)	0.27	(	0.06	)	0.27	(	0.08	)	0.93	0.09	10	-
		+ ChATcre:Ai32	Male (n=7)				Female (n=3)
		Stimulation	mean	(	SD	)	mean	(	SD	)	p-value	t	df	Change
		Swallow Duration (ms)	154	(	118	)	122	(	55	)	0.67	0.44	8	-
		XII Duration (ms)	178	(	107	)	129	(	60	)	0.48	0.73	8	-
		Vagus Duration (ms)	187	(	103	)	148	(	59	)	0.57	0.6	8	-
		Laryngeal Complex Duration (ms)	135	(	30	)	147	(	54	)	0.67	0.44	7	-
		Schluckatmung Duration (ms)	-	(	-	)	-	(	-	)	-	-	-	-
		Diaphragm Inter-Burst Interval (ms)	573	(	107	)	622	(	327	)	0.72	0.37	8	-
		SR Inspiratory Delay (ms)	340	(	59	)	377	(	187	)	0.62	0.51	8	-
		Swallow Sequence (ms)	29	(	18	)	32	(	28	)	0.83	0.22	7	-
		Swallow Onset: Insp Peak (ms)	129	(	23	)	182	(	183	)	0.43	0.83	8	-
		Swallow Onset: Insp Onset (0-1 of RC)	0.31	(	0.04	)	0.37	(	0.04	)	0.04	2.38	8	↑
