# Supplementary material for: Chronic intermittent hypoxia reveals role of the Postinspiratory Complex in the mediation of normal swallow production
Source: eLife. 2024 Apr 24;12:RP92175. doi: 10.7554/eLife.92175 (PMC11042803; doi:10.7554/eLife.92175)
Supplement: Supplementary file 3. [file elife-92175-supp3.xlsx]

## Sheet: Supplementary File 3
	Water Swallow		Male (n=5)				Female (n=6)
			mean	(	SD	)	mean	(	SD	)	p-value	t	df	Change
		Swallow Duration (ms)	346	(	238	)	277	(	139	)	0.56	0.61	9	-
		XII Duration (ms)	365	(	242	)	306	(	132	)	0.65	0.48	8	-
		Vagus Duration (ms)	365	(	239	)	294	(	138	)	0.58	0.58	8	-
		Laryngeal Complex Duration (ms)	410	(	326	)	356	(	162	)	0.73	0.36	9	-
		Schluckatmung Duration (ms)	85	(	39	)	219	(	-	)	0.1	2.95	2	-
		Diaphragm Inter-Burst Interval (ms)	1097	(	687	)	602	(	208	)	0.13	1.689	9	-
		SR Inspiratory Delay (ms)	542	(	399	)	211	(	72	)	0.07	2.018	9	-
		Swallow Sequence (ms)	66	(	80	)	45	(	70	)	0.66	0.46	9	-
		Swallow Onset: Insp Peak (ms)	225	(	134	)	125	(	75	)	0.15	1.573	9	-
		Swallow Onset: Insp Onset (0-1 of RC)	0.29	(	0.13	)	0.28	(	0.06	)	0.97	0.03	9	-
		+ Vglut2cre:Ai32	Male (n=3)				Female (n=5)
		Stimulation	mean	(	SD	)	mean	(	SD	)	p-value	t	df	Change
		Swallow Duration (ms)	145	(	52	)	113	(	39	)	0.36	0.99	6	-
		XII Duration (ms)	168	(	45	)	129	(	35	)	0.22	1.377	6	-
		Vagus Duration (ms)	172	(	51	)	131	(	37	)	0.24	1.32	6	-
		Laryngeal Complex Duration (ms)	170	(	61	)	145	(	40	)	0.49	0.73	6	-
		Schluckatmung Duration (ms)	95	(	-	)	79	(	-	)	-	-	-	-
		Diaphragm Inter-Burst Interval (ms)	584	(	281	)	384	(	218	)	0.3	1.14	6	-
		SR Inspiratory Delay (ms)	358	(	173	)	197	(	109	)	0.15	1.645	6	-
		Swallow Sequence (ms)	28	(	10	)	28	(	10	)	0.97	0.03	6	-
		Swallow Onset: Insp Peak (ms)	141	(	99	)	125	(	97	)	0.84	0.215	6	-
		Swallow Onset: Insp Onset (0-1 of RC)	0.35	(	0.1	)	0.4	(	0.02	)	0.329	1.061	6	-
