# Supplementary material for: Chronic intermittent hypoxia reveals role of the Postinspiratory Complex in the mediation of normal swallow production
Source: eLife. 2024 Apr 24;12:RP92175. doi: 10.7554/eLife.92175 (PMC11042803; doi:10.7554/eLife.92175)
Supplement: Supplementary file 4. [file elife-92175-supp4.xlsx]

## Sheet: Supplementary File 4
	Water Swallow		Male (n=2)				Female (n=7)
			mean	(	SD	)	mean	(	SD	)	p-value	t	df	Change
		Swallow Duration (ms)	193.9	(	65	)	240	(	68	)	0.43	0.85	7	-
		XII Duration (ms)	245	(	11	)	237	(	52	)	0.84	0.21	6	-
		Vagus Duration (ms)	234	(	51	)	262	(	68	)	0.61	0.53	7	-
		Laryngeal Complex Duration (ms)	221	(	56	)	271	(	58	)	0.33	1.055	7	-
		Schluckatmung Duration (ms)	-	(	-	)	263	(	141	)	-	-	-	-
		Diaphragm Inter-Burst Interval (ms)	1086	(	13	)	701	(	322	)	0.15	1.613	7	-
		SR Inspiratory Delay (ms)	730	(	51	)	343	(	232	)	0.06	2.242	7	-
		Swallow Sequence (ms)	8	(	7	)	41	(	25	)	0.12	1.79	7	-
		Swallow Onset: Insp Peak (ms)	202	(	113	)	167	(	98	)	0.68	0.4329	7	-
		Swallow Onset: Insp Onset (0-1 of RC)	0.26	(	0.09	)	0.38	(	0.05	)	0.04	2.513	7	↑
		+ ChATcre:Vglut2FlpO:ChR2	Male (n=4)				Female (n=7)
		Stimulation	mean	(	SD	)	mean	(	SD	)	p-value	t	df	Change
		Swallow Duration (ms)	130	(	27	)	127	(	38	)	0.89	0.14	9	-
		XII Duration (ms)	128	(	33	)	137	(	26	)	0.63	0.5	8	-
		Vagus Duration (ms)	138	(	42	)	139	(	36	)	0.96	0.05	9	-
		Laryngeal Complex Duration (ms)	122	(	32	)	158	(	30	)	0.1	1.819	9	-
		Schluckatmung Duration (ms)	-	(	-	)	114	(	-	)	-	-	-	-
		Diaphragm Inter-Burst Interval (ms)	847	(	290	)	623	(	367	)	0.32	1.04	9	-
		SR Inspiratory Delay (ms)	625	(	294	)	357	(	238	)	0.13	1.66	9	-
		Swallow Sequence (ms)	13	(	6	)	22	(	12	)	0.21	1.34	9	-
		Swallow Onset: Insp Peak (ms)	159	(	188	)	191	(	139	)	0.75	0.33	9	-
		Swallow Onset: Insp Onset (0-1 of RC)	0.26	(	0.14	)	0.3	(	0.05	)	0.48	0.74	9	-
